# Supplementary material for: Do Client Characteristics Really Drive the Big N Audit Quality Effect? New Evidence from Propensity Score Matching
Source: Atypon-hosted journal article supplement (doi:10.1287/mnsc.2016.2528), 2016-09-07
Supplement: mnsc.2016.2528-sm.pdf [file mnsc.2016.2528-sm.pdf]

## Internet Appendices

### Internet Appendix IA: Descriptive Statistics LMZ Analyses

| Variables                                                                                      | Big N   |        |           | Other audit firms |        |           | Difference |           |
|------------------------------------------------------------------------------------------------|---------|--------|-----------|-------------------|--------|-----------|------------|-----------|
|                                                                                                | Mean    | Median | Std. Dev. | Mean              | Median | Std. Dev. | Mean       | Median    |
| <b>Panel A: Big N (N=78,414) versus Other audit firms (N=19,477): Absolute DAC</b>             |         |        |           |                   |        |           |            |           |
| <b>Audit quality proxies</b>                                                                   |         |        |           |                   |        |           |            |           |
| Absolute DAC                                                                                   | 0.079   | 0.049  | 0.093     | 0.131             | 0.085  | 0.132     | -0.051***  | -0.036*** |
| <i>Matching variables</i>                                                                      |         |        |           |                   |        |           |            |           |
| Log(assets)                                                                                    | 5.283   | 5.160  | 2.165     | 2.734             | 2.538  | 1.859     | 2.550***   | 2.621***  |
| Asset turnover ratio                                                                           | 1.146   | 1.003  | 0.822     | 1.202             | 1.033  | 0.982     | -0.056***  | -0.030    |
| Current ratio                                                                                  | 2.914   | 1.955  | 3.262     | 3.055             | 1.725  | 4.152     | -0.141***  | 0.231***  |
| Leverage                                                                                       | 0.253   | 0.213  | 0.241     | 0.279             | 0.193  | 0.331     | -0.027***  | 0.020***  |
| ROA                                                                                            | -0.042  | 0.031  | 0.263     | -0.207            | -0.025 | 0.491     | 0.166***   | 0.057***  |
| <i>Control variables</i>                                                                       |         |        |           |                   |        |           |            |           |
| Current ratio                                                                                  | 2.914   | 1.955  | 3.262     | 3.055             | 1.725  | 4.152     | -0.141***  | 0.231***  |
| Leverage                                                                                       | 0.253   | 0.213  | 0.241     | 0.279             | 0.193  | 0.331     | -0.027***  | 0.020***  |
| ROA                                                                                            | -0.042  | 0.031  | 0.263     | -0.207            | -0.025 | 0.491     | 0.166***   | 0.057***  |
| Log(market value)                                                                              | 5.160   | 5.102  | 2.282     | 2.709             | 2.582  | 1.969     | 2.451***   | 2.519***  |
| <b>Panel B: Big N (N=22,580) versus Other audit firms (N=1,073): cost of equity capital</b>    |         |        |           |                   |        |           |            |           |
| <b>Audit quality proxy</b>                                                                     |         |        |           |                   |        |           |            |           |
| Cost of equity capital                                                                         | 0.125   | 0.096  | 0.109     | 0.140             | 0.106  | 0.114     | -0.014***  | -0.010*** |
| <b>Matching variables</b>                                                                      |         |        |           |                   |        |           |            |           |
| Log(assets)                                                                                    | 7.010   | 6.930  | 1.713     | 5.975             | 5.763  | 1.646     | 1.035***   | 1.167***  |
| Asset turnover ratio                                                                           | 1.094   | 0.951  | 0.703     | 1.019             | 0.869  | 0.667     | 0.075***   | 0.082***  |
| Current ratio                                                                                  | 2.153   | 1.726  | 1.558     | 2.414             | 1.922  | 1.729     | -0.262***  | -0.197*** |
| Leverage                                                                                       | 0.268   | 0.258  | 0.188     | 0.251             | 0.236  | 0.197     | 0.017***   | 0.022***  |
| ROA                                                                                            | 0.050   | 0.052  | 0.090     | 0.048             | 0.054  | 0.107     | 0.002      | -0.001    |
| <b>Control variables</b>                                                                       |         |        |           |                   |        |           |            |           |
| Beta                                                                                           | 1.150   | 1.037  | 0.867     | 1.280             | 1.152  | 1.054     | -0.130***  | -0.115*** |
| Earnings variability                                                                           | 0.124   | 0.060  | 0.217     | 0.119             | 0.060  | 0.185     | 0.006      | 0.000**   |
| Growth                                                                                         | 0.477   | 0.205  | 1.037     | 0.518             | 0.246  | 0.945     | -0.041     | -0.040**  |
| Log(book-to-market)                                                                            | -0.914  | -0.846 | 0.703     | -0.866            | -0.802 | 0.640     | -0.048**   | -0.044*   |
| Log(leverage)                                                                                  | -1.640  | -1.246 | 1.383     | -1.888            | -1.260 | 1.694     | 0.248***   | 0.013**   |
| Log(market value)                                                                              | 7.050   | 6.955  | 1.716     | 6.102             | 5.986  | 1.472     | 0.948***   | 0.969***  |
| <b>Panel C: Big N (N=30,299) versus Other audit firms (N=1,354): analyst forecast accuracy</b> |         |        |           |                   |        |           |            |           |
| <b>Audit quality proxy</b>                                                                     |         |        |           |                   |        |           |            |           |
| Analyst forecast accuracy                                                                      | -0.013  | -0.001 | 0.062     | -0.020            | -0.002 | 0.125     | 0.007***   | 0.000***  |
| <b>Matching variables</b>                                                                      |         |        |           |                   |        |           |            |           |
| Log(assets)                                                                                    | 6.672   | 6.557  | 1.778     | 5.774             | 5.524  | 1.644     | 0.899***   | 1.032***  |
| Asset turnover ratio                                                                           | 1.092   | 0.955  | 0.737     | 1.016             | 0.887  | 0.681     | 0.076***   | 0.068***  |
| Current ratio                                                                                  | 2.646   | 1.902  | 2.514     | 3.120             | 2.306  | 2.705     | -0.475***  | -0.404*** |
| Leverage                                                                                       | 0.246   | 0.225  | 0.209     | 0.217             | 0.165  | 0.214     | 0.029***   | 0.060***  |
| ROA                                                                                            | 0.032   | 0.052  | 0.142     | 0.040             | 0.058  | 0.147     | -0.009**   | -0.005*** |
| <b>Control variables</b>                                                                       |         |        |           |                   |        |           |            |           |
| Actual eps <sub>t+1</sub>                                                                      | 0.724   | 0.700  | 2.282     | 0.494             | 0.560  | 2.488     | 0.230***   | 0.140***  |
| Analyst following                                                                              | 2.567   | 2.565  | 0.685     | 2.231             | 2.079  | 0.634     | 0.336***   | 0.486***  |
| Horizon                                                                                        | 3.411   | 3.497  | 0.465     | 3.430             | 3.526  | 0.483     | -0.019     | -0.030**  |
| Log(market value) <sub>t+1</sub>                                                               | 6.772   | 6.657  | 1.743     | 5.983             | 5.821  | 1.526     | 0.789***   | 0.836***  |
| Loss <sub>t+1</sub>                                                                            | 0.219   | 0.000  | 0.414     | 0.212             | 0.000  | 0.409     | 0.007      | 0.000     |
| ROE volatility                                                                                 | 112.144 | 18.657 | 335.283   | 37.230            | 7.090  | 99.203    | 74.914***  | 11.567*** |
| Surprise                                                                                       | 0.008   | 0.007  | 0.147     | 0.009             | 0.007  | 0.117     | -0.001     | 0.000     |
| Zmijevski bankruptcy score                                                                     | 0.140   | 0.037  | 0.222     | 0.094             | 0.010  | 0.185     | 0.046***   | 0.028***  |

*Notes.* This table presents descriptive statistics on all variables used in analyses that replicate LMZ. Big N equals one when a firm's annual financial statements are audited by a Big 5 auditor (Arthur Anderson, PricewaterhouseCoopers, Deloitte & Touche, Ernst & Young, or KPMG), and zero otherwise. All measures are as defined in Appendix A. Panel A provides descriptive statistics on the sample used for absolute DAC separately for Big N and non-Big N firms, Panel B reports descriptive statistics for cost of equity capital, and Panel C reports descriptive statistics for analyst forecast accuracy. All regressions include 2-digit SIC code and year indicators. Two-sample *t*-tests are used to test the differences in means, and Wilcoxon two-sample tests are used to test differences in medians. \*, \*\*, and \*\*\* indicate two-tailed statistical significance at the 10%, 5%, and 1% levels, respectively.

## Internet Appendix IB: Descriptive Statistics: Post-SOX Analyses

| Variables                                                                                   | Big N   |        |           | Other audit firms |        |           | Difference |           |
|---------------------------------------------------------------------------------------------|---------|--------|-----------|-------------------|--------|-----------|------------|-----------|
|                                                                                             | Mean    | Median | Std. Dev. | Mean              | Median | Std. Dev. | Mean       | Median    |
| Panel A: Big N (N=18,683) versus Other audit firms (N=7,022): Absolute DAC and Restatements |         |        |           |                   |        |           |            |           |
| <b>Audit quality proxies</b>                                                                |         |        |           |                   |        |           |            |           |
| Absolute DAC                                                                                | 0.047   | 0.032  | 0.052     | 0.073             | 0.049  | 0.076     | -0.026***  | -0.017*** |
| Restatement                                                                                 | 0.014   | 0.000  | 0.118     | 0.022             | 0.000  | 0.145     | -0.007***  | 0.000***  |
| <b>Matching variables</b>                                                                   |         |        |           |                   |        |           |            |           |
| Log(assets)                                                                                 | 6.616   | 6.587  | 1.761     | 4.217             | 4.132  | 1.362     | 2.399***   | 2.455***  |
| Asset turnover ratio                                                                        | 1.194   | 1.010  | 0.838     | 1.261             | 1.107  | 0.921     | -0.067***  | -0.098*** |
| Current ratio                                                                               | 2.810   | 2.105  | 2.309     | 3.323             | 2.347  | 2.992     | -0.513***  | -0.241*** |
| Leverage                                                                                    | 0.202   | 0.161  | 0.208     | 0.157             | 0.076  | 0.202     | 0.045***   | 0.085***  |
| ROA                                                                                         | -0.006  | 0.044  | 0.196     | -0.087            | 0.008  | 0.279     | 0.081***   | 0.036***  |
| <b>Control variables</b>                                                                    |         |        |           |                   |        |           |            |           |
| Accruals <sub>t-1</sub>                                                                     | -0.070  | -0.054 | 0.110     | -0.083            | -0.055 | 0.161     | 0.013***   | 0.001     |
| Altman z-score                                                                              | 1.649   | 1.991  | 2.770     | 1.051             | 2.040  | 4.166     | 0.599***   | -0.049*** |
| Litigation                                                                                  | 0.323   | 0.000  | 0.468     | 0.304             | 0.000  | 0.460     | 0.018***   | 0.000***  |
| Log(assets)                                                                                 | 6.616   | 6.587  | 1.761     | 4.217             | 4.132  | 1.362     | 2.399***   | 2.455***  |
| Loss                                                                                        | 0.291   | 0.000  | 0.454     | 0.472             | 0.000  | 0.499     | -0.181***  | 0.000***  |
| Market-to-book ratio                                                                        | 2.970   | 2.198  | 4.260     | 2.673             | 1.767  | 4.374     | 0.297***   | 0.431***  |
| Operating cash flow                                                                         | 0.071   | 0.095  | 0.174     | -0.003            | 0.050  | 0.238     | 0.074***   | 0.045***  |
| Operating cash flow volatility                                                              | 87.560  | 23.681 | 187.928   | 9.532             | 3.676  | 24.828    | 78.028***  | 20.006*** |
| PP&E growth                                                                                 | 11.021  | 3.024  | 40.200    | 13.552            | 0.075  | 57.409    | -2.531***  | 2.949***  |
| Sales growth                                                                                | 13.886  | 8.121  | 41.048    | 15.151            | 6.340  | 53.865    | -1.265**   | 1.781***  |
| Sales volatility                                                                            | 340.533 | 76.357 | 808.662   | 29.942            | 8.777  | 82.718    | 310.591*** | 67.580*** |
| Shares issued                                                                               | 0.882   | 1.000  | 0.323     | 0.792             | 1.000  | 0.406     | 0.090***   | 0.000***  |
| Stock return                                                                                | 0.202   | 0.095  | 0.648     | 0.152             | 0.000  | 0.757     | 0.050***   | 0.095***  |
| Stock return volatility                                                                     | 0.124   | 0.108  | 0.071     | 0.158             | 0.137  | 0.090     | -0.034***  | -0.029*** |
| Total leverage                                                                              | 0.494   | 0.480  | 0.252     | 0.422             | 0.369  | 0.266     | 0.072***   | 0.111***  |
| # Geographic segments                                                                       | 2.709   | 2.000  | 2.359     | 1.919             | 1.000  | 2.173     | 0.790***   | 1.000***  |
| # Operating segments                                                                        | 2.052   | 1.000  | 1.681     | 1.678             | 1.000  | 1.243     | 0.375***   | 0.000***  |
| Panel B: Big N (N=9,692) versus Other audit firms (N=3,632): Income-increasing DAC          |         |        |           |                   |        |           |            |           |
| <b>Audit quality proxy</b>                                                                  |         |        |           |                   |        |           |            |           |
| Income-increasing DAC                                                                       | 0.046   | 0.032  | 0.049     | 0.072             | 0.049  | 0.075     | -0.027***  | -0.017*** |
| <b>Matching variables</b>                                                                   |         |        |           |                   |        |           |            |           |
| Log(assets)                                                                                 | 6.639   | 6.621  | 1.754     | 4.274             | 4.214  | 1.377     | 2.365***   | 2.407***  |
| Asset turnover ratio                                                                        | 1.172   | 0.991  | 0.837     | 1.281             | 1.123  | 0.957     | -0.109***  | -0.131*** |
| Current ratio                                                                               | 3.070   | 2.233  | 2.670     | 3.764             | 2.640  | 3.407     | -0.695***  | -0.408*** |
| Leverage                                                                                    | 0.205   | 0.165  | 0.210     | 0.158             | 0.069  | 0.207     | 0.047***   | 0.096***  |
| ROA                                                                                         | 0.011   | 0.050  | 0.181     | -0.050            | 0.028  | 0.258     | 0.061***   | 0.022***  |
| <b>Control variables</b>                                                                    |         |        |           |                   |        |           |            |           |
| Accruals <sub>t-1</sub>                                                                     | -0.059  | -0.047 | 0.100     | -0.068            | -0.046 | 0.150     | 0.010***   | -0.001    |
| Altman z-score                                                                              | 1.792   | 2.051  | 2.640     | 1.442             | 2.259  | 4.028     | 0.350***   | -0.208*** |
| Litigation                                                                                  | 0.321   | 0.000  | 0.467     | 0.317             | 0.000  | 0.465     | 0.004      | 0.000***  |
| Log(assets)                                                                                 | 6.639   | 6.621  | 1.754     | 4.274             | 4.214  | 1.377     | 2.365***   | 2.407***  |
| Loss                                                                                        | 0.247   | 0.000  | 0.431     | 0.397             | 0.000  | 0.489     | -0.150***  | 0.000***  |
| Market-to-book ratio                                                                        | 2.885   | 2.191  | 3.735     | 2.736             | 1.837  | 3.926     | 0.149**    | 0.354***  |
| Operating cash flow                                                                         | 0.054   | 0.082  | 0.166     | -0.022            | 0.034  | 0.229     | 0.076***   | 0.048***  |
| Operating cash flow volatility                                                              | 82.114  | 21.967 | 180.017   | 9.554             | 3.702  | 26.082    | 72.561***  | 18.266*** |
| PP&E growth                                                                                 | 12.980  | 4.424  | 40.955    | 15.886            | 2.338  | 57.118    | -2.906***  | 2.086***  |
| Sales growth                                                                                | 14.941  | 8.805  | 43.457    | 18.508            | 8.893  | 56.301    | -3.567***  | -0.089    |
| Sales volatility                                                                            | 319.537 | 78.008 | 733.114   | 30.747            | 9.236  | 77.636    | 288.790*** | 68.772*** |

|                         |       |       |       |       |       |       |           |           |
|-------------------------|-------|-------|-------|-------|-------|-------|-----------|-----------|
| Shares issued           | 0.890 | 1.000 | 0.313 | 0.805 | 1.000 | 0.397 | 0.085***  | 0.000***  |
| Stock return            | 0.220 | 0.115 | 0.631 | 0.189 | 0.018 | 0.739 | 0.031**   | 0.097***  |
| Stock return volatility | 0.121 | 0.104 | 0.068 | 0.154 | 0.133 | 0.089 | -0.033*** | -0.028*** |

**Appendix D (Continued)**

|                       |       |       |       |       |       |       |          |          |
|-----------------------|-------|-------|-------|-------|-------|-------|----------|----------|
| Total leverage        | 0.478 | 0.468 | 0.246 | 0.393 | 0.342 | 0.254 | 0.085*** | 0.126*** |
| # Geographic segments | 2.702 | 2.000 | 2.381 | 1.990 | 1.000 | 2.249 | 0.712*** | 1.000*** |
| # Operating segments  | 2.067 | 1.000 | 1.691 | 1.699 | 1.000 | 1.277 | 0.368*** | 0.000*** |

Panel C: Big N (N=4,735) versus Other audit firms (N=2,904): going concern opinions

|                            |        |        |        |        |        |        |            |            |
|----------------------------|--------|--------|--------|--------|--------|--------|------------|------------|
| <b>Audit quality proxy</b> |        |        |        |        |        |        |            |            |
| Going concern              | 0.028  | 0.000  | 0.166  | 0.029  | 0.000  | 0.168  | -0.001     | 0.000      |
| <b>Matching variables</b>  |        |        |        |        |        |        |            |            |
| Log(assets)                | 5.518  | 5.362  | 1.579  | 3.839  | 3.704  | 1.285  | 1.680***   | 1.659***   |
| Asset turnover ratio       | 0.901  | 0.697  | 0.828  | 1.052  | 0.871  | 0.925  | -0.151***  | -0.174***  |
| Current ratio              | 3.660  | 2.474  | 3.627  | 3.781  | 2.276  | 4.301  | -0.121     | 0.198***   |
| Leverage                   | 0.203  | 0.111  | 0.245  | 0.164  | 0.070  | 0.218  | 0.040***   | 0.041***   |
| ROA                        | -0.202 | -0.104 | 0.261  | -0.229 | -0.116 | 0.315  | 0.027***   | 0.012*     |
| <b>Control variables</b>   |        |        |        |        |        |        |            |            |
| Future finance             | 0.917  | 1.000  | 0.276  | 0.836  | 1.000  | 0.370  | 0.081***   | 0.000***   |
| Idiosyncratic volatility   | 0.145  | 0.126  | 0.078  | 0.164  | 0.142  | 0.096  | -0.019***  | -0.016***  |
| Investments                | 0.376  | 0.291  | 0.310  | 0.312  | 0.215  | 0.286  | 0.064***   | 0.076***   |
| Log(assets)                | 5.518  | 5.362  | 1.579  | 3.839  | 3.704  | 1.285  | 1.680***   | 1.659***   |
| Log(firm age)              | 2.563  | 2.565  | 0.669  | 2.619  | 2.639  | 0.663  | -0.056***  | -0.074***  |
| Loss <sub>t-1</sub>        | 0.668  | 1.000  | 0.471  | 0.703  | 1.000  | 0.457  | -0.036***  | 0.000***   |
| Operating cash flow        | -0.094 | -0.009 | 0.259  | -0.135 | -0.043 | 0.285  | 0.041***   | 0.034***   |
| Reporting lag              | 56.508 | 55.000 | 21.706 | 73.046 | 74.000 | 21.321 | -16.538*** | -19.000*** |
| Stock return               | -0.010 | -0.138 | 0.664  | -0.024 | -0.169 | 0.705  | 0.014      | 0.031**    |
| Stock return beta          | 1.745  | 1.570  | 1.633  | 1.416  | 1.176  | 1.812  | 0.328***   | 0.394***   |
| Total leverage             | 0.504  | 0.471  | 0.308  | 0.436  | 0.382  | 0.289  | 0.068***   | 0.089***   |
| Total leverage increase    | 0.040  | 0.026  | 0.166  | 0.027  | 0.022  | 0.177  | 0.013***   | 0.004***   |
| Zmijevski bankruptcy score | 0.303  | 0.128  | 0.351  | 0.277  | 0.089  | 0.347  | 0.027***   | 0.039***   |

*Notes.* This table presents descriptive statistics on all variables used in post-SOX analyses (2004-2013). Big N equals one when a firm's annual financial statements are audited by a Big 4 auditor (PricewaterhouseCoopers, Deloitte & Touche, Ernst & Young, or KPMG), and zero otherwise. All measures are as defined in Appendix B. Panel A provides descriptive statistics on the sample used for absolute DAC (discretionary accrual regression models include 2-digit SIC code, year, and closest SEC office indicators) and restatement analyses (restatement regression model includes year and closest SEC office indicators, and absolute discretionary accruals) separately for Big N and non-Big N firms, panel B reports descriptive statistics for income-increasing DAC (only firm-year observations with positive discretionary accruals are included), and panel C reports descriptive statistics for the going concern opinion analyses. Two-sample *t*-tests are used to test the differences in means, and Wilcoxon two-sample tests are used to test differences in medians. \*, \*\*, and \*\*\* indicate two-tailed statistical significance at the 10%, 5%, and 1% levels, respectively.

## Internet Appendix IC: Effects of LMZ's Winsorization and Accrual Estimation Research Design Choices

Panel A: Replicating LMZ without Correcting their Winsorization and Accrual Estimation Research Design Choices

| Included samples    | Nobs   | Reuse | Std. Bias | L1    | Mean   | Median | Std. Dev. | Range  |       | PCT Sign | PCT Significant |       |       |
|---------------------|--------|-------|-----------|-------|--------|--------|-----------|--------|-------|----------|-----------------|-------|-------|
|                     |        |       |           |       |        |        |           | Min.   | Max.  |          | 10%             | 5%    | 1%    |
| Without replacement | 11,603 | 1.000 | 0.812     | 0.144 | -0.011 | -0.012 | 0.010     | -0.037 | 0.023 | 0.866    | 0.450           | 0.228 | 0.033 |
| With replacement    | 6,341  | 2.782 | 1.923     | 0.264 | 0.000  | -0.002 | 0.038     | -0.797 | 0.674 | 0.564    | 0.061           | 0.025 | 0.005 |

Panel B: Winsorization of Compustat Data Items as Opposed to Variables

|                             | % Change in Variance |              | Rank Correlation |              |
|-----------------------------|----------------------|--------------|------------------|--------------|
|                             | LMZ                  | Conventional | LMZ              | Conventional |
| <b>Accrual Model Inputs</b> |                      |              |                  |              |
| Total Accruals              | -11.4%               | -32.9%       | 0.994            | 1.000        |
| 1/Total Assets              | -70.6%               | -76.1%       | 1.000            | 1.000        |
| ΔSales                      | -1.9%                | -34.2%       | 0.995            | 1.000        |
| PP&E                        | -0.7%                | -1.4%        | 0.998            | 1.000        |
| ROA                         | -4.0%                | -23.4%       | 0.692            | 1.000        |
| <b>Matching variables</b>   |                      |              |                  |              |
| Log(assets)                 | -1.1%                | -1.3%        | 1.000            | 1.000        |
| Asset turnover ratio        | -0.5%                | -14.5%       | 0.996            | 1.000        |
| Current ratio               | -66.4%               | -79.1%       | 0.997            | 1.000        |
| Leverage                    | -0.5%                | -2.1%        | 0.998            | 1.000        |
| ROA                         | -4.0%                | -23.4%       | 0.692            | 1.000        |
| <b>Control variables</b>    |                      |              |                  |              |
| Current ratio               | -66.4%               | -79.1%       | 0.997            | 1.000        |
| Leverage                    | -0.5%                | -2.1%        | 0.998            | 1.000        |
| ROA                         | -4.0%                | -23.4%       | 0.692            | 1.000        |
| Log(market value)           | -1.6%                | -1.4%        | 0.999            | 1.000        |

Panel C: Effects of Omitting Standard Data Requirements for Accrual Model Estimation on Mean Square Error

|                   | LMZ   |           |          | Conventional |           |          |
|-------------------|-------|-----------|----------|--------------|-----------|----------|
|                   | Mean  | Std. Dev. | Skewness | Mean         | Std. Dev. | Skewness |
| Mean Square Error | 0.138 | 0.502     | 23.234   | 0.114        | 0.045     | 0.396    |

*Notes.* This appendix examines how LMZ's winsorization and accrual estimation research design choices affect the Big N effect. Panel A presents the results of an analysis that repeats the analysis presented in Figure 1 using the research design choices made by LMZ. *Nobs* is the average number of treatment firms retained in matched samples, *Reuse* equals the average of the average number of times each control firm is matched to treatment firms, *Std. Bias* equals the average of the average of the absolute standardized percentage bias across all covariates, *L1* equals the average multivariate *L1*, *PCT Sign* is the percentage of treatment effects that are in the predicted direction, and *PCT Significant* is the percentage of treatment effects that are in the predicted direction and significant at  $p < 10%$ ,  $p < 5%$ , and  $p < 1%$  (two-tailed). We classify matched samples as balanced when univariate t-tests cannot reject the null hypothesis that the means of the matching variables do not differ between Big N and non-

Big N clients ( $p > 10\%$ , two-tailed). Further, we estimate all regressions using probability weights derived from the matching procedure and cluster standard errors at the firm level (Dehejia and Wahba 2002). Panel B presents a comparison between LMZ's winsorization of the Compustat Data Items and the more conventional method of winsorizing the variables used in the analyses. Specifically, it compares the variance of the winsorized variables and their rank correlation with the unwinsorized variables. For the purpose of this comparison, we only include firm-year observations that appear in both our and LMZ's sample. Panel C examines how the estimation of discretionary accruals is affected by not imposing a minimum number of observations per industry-year group and not excluding firm-year observations with accruals larger than assets. Specifically, the panel compares the distribution of the Mean Square Errors of the discretionary accruals models by firm and year using LMZ's approach compared with our conventional approach.

## Internet Appendix ID: LMZ Replication: Cost of Equity Capital and Analyst Forecast Accuracy

### Density plots

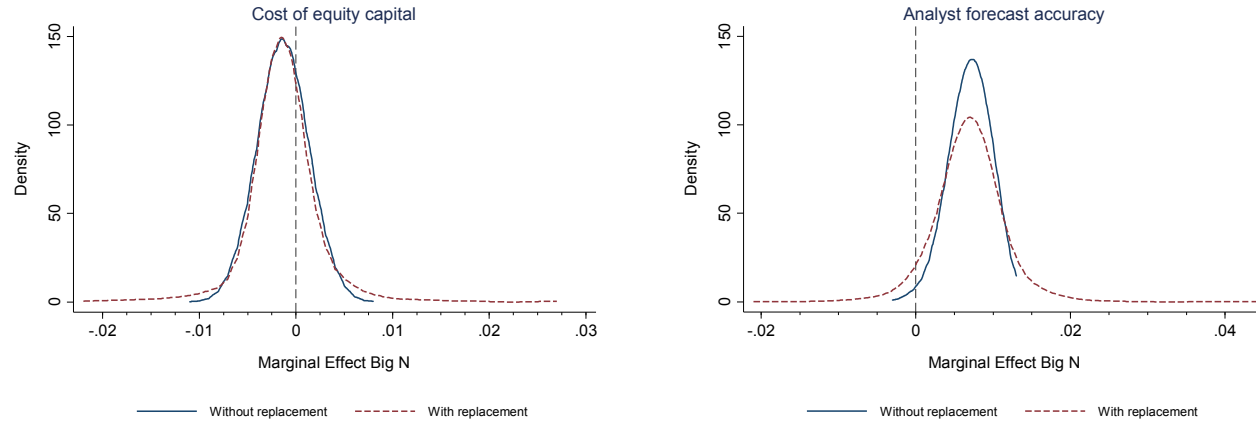

### Descriptive Statistics

| Panel A: Cost of equity capital |       |        |           |       |        |        |           |        |       |          |                 |       |       |
|---------------------------------|-------|--------|-----------|-------|--------|--------|-----------|--------|-------|----------|-----------------|-------|-------|
| Included samples                | Nobs  | Reuse  | Std. Bias | L1    | Mean   | Median | Std. Dev. | Range  |       | PCT Sign | PCT Significant |       |       |
|                                 |       |        |           |       |        |        |           | Min.   | Max.  |          | 10%             | 5%    | 1%    |
| Without replacement             | 1,064 | 1.000  | 2.557     | 0.799 | -0.001 | -0.001 | 0.002     | -0.011 | 0.008 | 0.654    | 0.022           | 0.005 | 0.000 |
| With replacement                | 4,737 | 10.041 | 2.356     | 0.815 | -0.001 | -0.001 | 0.004     | -0.022 | 0.027 | 0.670    | 0.026           | 0.010 | 0.002 |

  

| Panel B: Analyst forecast accuracy |       |        |           |       |       |        |           |        |       |          |                 |       |       |
|------------------------------------|-------|--------|-----------|-------|-------|--------|-----------|--------|-------|----------|-----------------|-------|-------|
| Included samples                   | Nobs  | Reuse  | Std. Bias | L1    | Mean  | Median | Std. Dev. | Range  |       | PCT Sign | PCT Significant |       |       |
|                                    |       |        |           |       |       |        |           | Min.   | Max.  |          | 10%             | 5%    | 1%    |
| Without replacement                | 1,338 | 1.000  | 2.214     | 0.673 | 0.007 | 0.007  | 0.002     | -0.003 | 0.013 | 0.003    | 0.000           | 0.000 | 0.000 |
| With replacement                   | 7,917 | 13.011 | 1.864     | 0.718 | 0.007 | 0.007  | 0.004     | -0.021 | 0.044 | 0.039    | 0.001           | 0.000 | 0.000 |

*Notes.* This appendix repeats the analysis presented in Figure 1 for cost of equity capital and analyst forecast accuracy. See Appendix A for variable definitions and Panels B and C of Appendix C for regression specifications. The density plots are based on Big N coefficient estimates derived from OLS regressions. The table presents summary statistics for the regression results presented in the density plot, where *Nobs* equals the average number of treatment firms retained in matched samples, *Reuse* equals the average of the average number of times included control firms are matched to treatment firms, *Std. Bias* equals the average of the average of the absolute standardized percentage bias across all covariates, *L1* equals the average multivariate *L1*, *PCT Sign* is the fraction of treatment effects that are in the predicted direction (negative), and *PCT Significant* is the fraction of treatment effects that are in the predicted direction and significant at either  $p < 10\%$ ,  $p < 5\%$ , or  $p < 1\%$  (two-tailed). We classify matched samples as balanced when univariate t-tests cannot reject the null hypothesis that the means of the

matching variables do not differ between Big N and non-Big N clients ( $p > 10\%$ , two-tailed). Further, we estimate all regressions using probability weights derived from the matching procedure and cluster standard errors at the firm level (Dehejia and Wahba 2002).

### Internet Appendix IE: Alternative Covariate Balance Criteria

**IE Table 2 Descriptive Statistics LMZ Analysis – Absolute Discretionary Accruals**

| <i>Goodness-of-fit test</i>   |        |       |           |       |        |        |           |        |        |          |                 |       |       |
|-------------------------------|--------|-------|-----------|-------|--------|--------|-----------|--------|--------|----------|-----------------|-------|-------|
| Included samples              | Nobs   | Reuse | Std. Bias | L1    | Mean   | Median | Std. Dev. | Range  |        | PCT Sign | PCT Significant |       |       |
|                               |        |       |           |       |        |        |           | Min.   | Max.   |          | 10%             | 5%    | 1%    |
| Without replacement           | 16,418 | 1.000 | 0.773     | 0.390 | -0.003 | -0.003 | 0.001     | -0.006 | -0.001 | 1.000    | 0.814           | 0.613 | 0.189 |
| With replacement              | 33,991 | 4.993 | 1.294     | 0.444 | -0.005 | -0.005 | 0.002     | -0.033 | 0.007  | 0.986    | 0.894           | 0.833 | 0.681 |
| <i>Standardized bias test</i> |        |       |           |       |        |        |           |        |        |          |                 |       |       |
| Included samples              | Nobs   | Reuse | Std. Bias | L1    | Mean   | Median | Std. Dev. | Range  |        | PCT Sign | PCT Significant |       |       |
|                               |        |       |           |       |        |        |           | Min.   | Max.   |          | 10%             | 5%    | 1%    |
| Without replacement           | 16,418 | 1.000 | 0.837     | 0.390 | -0.003 | -0.003 | 0.001     | -0.006 | -0.001 | 1.000    | 0.826           | 0.615 | 0.203 |
| With replacement              | 43,941 | 6.057 | 1.285     | 0.435 | -0.005 | -0.005 | 0.001     | -0.015 | 0.002  | 0.999    | 0.940           | 0.890 | 0.743 |

**IE Table 3 Descriptive Statistics Post-SOX Analysis – Four Audit Quality Measures**

| <i>Goodness-of-fit test</i>           |        |       |           |       |        |        |           |        |        |          |                 |       |       |
|---------------------------------------|--------|-------|-----------|-------|--------|--------|-----------|--------|--------|----------|-----------------|-------|-------|
| Panel A: Matching without replacement |        |       |           |       |        |        |           |        |        |          |                 |       |       |
| Audit quality measure                 | Nobs   | Reuse | Std. Bias | L1    | Mean   | Median | Std. Dev. | Range  |        | PCT Sign | PCT Significant |       |       |
|                                       |        |       |           |       |        |        |           | Min.   | Max.   |          | 10%             | 5%    | 1%    |
| Absolute DAC                          | 4,507  | 1.000 | 1.972     | 0.693 | -0.007 | -0.007 | 0.001     | -0.010 | -0.004 | 1.000    | 1.000           | 1.000 | 0.999 |
| Income-increasing DAC                 | 2,380  | 1.000 | 2.263     | 0.717 | -0.007 | -0.007 | 0.001     | -0.011 | -0.004 | 1.000    | 1.000           | 0.999 | 0.981 |
| Restatements                          | 4,513  | 1.000 | 1.984     | 0.693 | -0.006 | -0.006 | 0.002     | -0.011 | 0.001  | 0.997    | 0.690           | 0.524 | 0.209 |
| Going concern opinions                | 1,763  | 1.000 | 2.030     | 0.643 | 0.023  | 0.023  | 0.003     | 0.003  | 0.032  | 1.000    | 0.999           | 0.997 | 0.972 |
| Panel B: Matching with replacement    |        |       |           |       |        |        |           |        |        |          |                 |       |       |
| Audit quality measure                 | Nobs   | Reuse | Std. Bias | L1    | Mean   | Median | Std. Dev. | Range  |        | PCT Sign | PCT Significant |       |       |
|                                       |        |       |           |       |        |        |           | Min.   | Max.   |          | 10%             | 5%    | 1%    |
| Absolute DAC                          | 14,297 | 6.207 | 2.876     | 0.774 | -0.004 | -0.003 | 0.002     | -0.012 | 0.000  | 0.998    | 0.813           | 0.641 | 0.337 |
| Income-increasing DAC                 | 8,860  | 7.220 | 3.505     | 0.820 | -0.004 | -0.004 | 0.001     | -0.010 | -0.001 | 1.000    | 0.919           | 0.760 | 0.254 |
| Restatements                          | 14,548 | 6.262 | 2.857     | 0.774 | -0.001 | -0.001 | 0.002     | -0.013 | 0.004  | 0.542    | 0.064           | 0.032 | 0.009 |
| Going concern opinions                | 4,664  | 4.994 | 3.880     | 0.764 | 0.017  | 0.017  | 0.002     | 0.009  | 0.025  | 1.000    | 0.996           | 0.986 | 0.867 |
| <i>Standardized bias test</i>         |        |       |           |       |        |        |           |        |        |          |                 |       |       |
| Panel A: Matching without replacement |        |       |           |       |        |        |           |        |        |          |                 |       |       |
| Audit quality measure                 | Nobs   | Reuse | Std. Bias | L1    | Mean   | Median | Std. Dev. | Range  |        | PCT Sign | PCT Significant |       |       |
|                                       |        |       |           |       |        |        |           | Min.   | Max.   |          | 10%             | 5%    | 1%    |
| Absolute DAC                          | 4,438  | 1.000 | 1.417     | 0.693 | -0.007 | -0.007 | 0.001     | -0.010 | -0.004 | 1.000    | 1.000           | 0.999 | 0.996 |
| Income-increasing DAC                 | 2,310  | 1.000 | 1.312     | 0.717 | -0.007 | -0.007 | 0.001     | -0.014 | -0.004 | 1.000    | 0.997           | 0.995 | 0.961 |
| Restatements                          | 4,449  | 1.000 | 1.419     | 0.693 | -0.006 | -0.006 | 0.002     | -0.013 | 0.001  | 0.994    | 0.716           | 0.535 | 0.208 |
| Going concern opinions                | 1,730  | 1.000 | 1.290     | 0.646 | 0.023  | 0.023  | 0.003     | 0.011  | 0.036  | 1.000    | 0.999           | 0.992 | 0.947 |
| Panel B: Matching with replacement    |        |       |           |       |        |        |           |        |        |          |                 |       |       |
| Audit quality measure                 | Nobs   | Reuse | Std. Bias | L1    | Mean   | Median | Std. Dev. | Range  |        | PCT Sign | PCT Significant |       |       |
|                                       |        |       |           |       |        |        |           | Min.   | Max.   |          | 10%             | 5%    | 1%    |
| Absolute DAC                          | 9,227  | 4.395 | 1.308     | 0.737 | -0.006 | -0.006 | 0.002     | -0.014 | -0.001 | 1.000    | 0.968           | 0.944 | 0.770 |
| Income-increasing DAC                 | 5,952  | 5.143 | 1.244     | 0.774 | -0.006 | -0.006 | 0.002     | -0.015 | 0.001  | 0.999    | 0.981           | 0.944 | 0.755 |
| Restatements                          | 9,056  | 4.382 | 1.290     | 0.737 | -0.003 | -0.003 | 0.003     | -0.018 | 0.006  | 0.811    | 0.209           | 0.122 | 0.027 |
| Going concern opinions                | 3,299  | 3.768 | 1.345     | 0.723 | 0.018  | 0.018  | 0.003     | 0.007  | 0.035  | 1.000    | 0.968           | 0.928 | 0.769 |

**IE Table 4 Descriptive Statistics Post-SOX Analysis – Second Tier and Small Auditors**

*Goodness-of-fit test*

Panel A: Effect of Matching Method on the Representation of Second Tier Firms

| Audit quality measure  | Before matching | Matching without replacement | Matching with replacement |
|------------------------|-----------------|------------------------------|---------------------------|
| Absolute DAC           | 0.472           | 0.557                        | 0.716                     |
| Income-increasing DAC  | 0.463           | 0.544                        | 0.726                     |
| Restatements           | 0.472           | 0.557                        | 0.717                     |
| Going concern opinions | 0.429           | 0.499                        | 0.612                     |

Panel B: Matching without replacement – Big N versus Second Tier

| Audit quality measure  | Nobs  | Reuse | Std. Bias | L1    | Mean   | Median | Std. Dev. | Range  |       | PCT Sign | PCT Significant |       |       |
|------------------------|-------|-------|-----------|-------|--------|--------|-----------|--------|-------|----------|-----------------|-------|-------|
|                        |       |       |           |       |        |        |           | Min.   | Max.  |          | 10%             | 5%    | 1%    |
| Absolute DAC           | 3,082 | 1.000 | 1.734     | 0.689 | -0.003 | -0.003 | 0.001     | -0.005 | 0.000 | 0.994    | 0.307           | 0.114 | 0.008 |
| Income-increasing DAC  | 1,571 | 1.000 | 2.289     | 0.712 | -0.002 | -0.002 | 0.001     | -0.006 | 0.001 | 0.945    | 0.096           | 0.023 | 0.001 |
| Restatements           | 3,074 | 1.000 | 1.701     | 0.689 | -0.005 | -0.005 | 0.002     | -0.012 | 0.008 | 0.995    | 0.446           | 0.270 | 0.067 |
| Going concern opinions | 1,146 | 1.000 | 2.641     | 0.694 | 0.016  | 0.016  | 0.004     | 0.001  | 0.029 | 1.000    | 0.679           | 0.254 | 0.001 |

Panel C: Matching with replacement – Big N versus Second Tier

| Audit quality measure  | Nobs   | Reuse  | Std. Bias | L1    | Mean   | Median | Std. Dev. | Range  |       | PCT Sign | PCT Significant |       |       |
|------------------------|--------|--------|-----------|-------|--------|--------|-----------|--------|-------|----------|-----------------|-------|-------|
|                        |        |        |           |       |        |        |           | Min.   | Max.  |          | 10%             | 5%    | 1%    |
| Absolute DAC           | 15,917 | 10.830 | 3.104     | 0.811 | -0.001 | -0.001 | 0.001     | -0.018 | 0.011 | 0.513    | 0.040           | 0.018 | 0.003 |
| Income-increasing DAC  | 8,856  | 11.807 | 3.200     | 0.847 | 0.000  | 0.000  | 0.001     | -0.005 | 0.003 | 0.325    | 0.001           | 0.001 | 0.000 |
| Restatements           | 16,077 | 10.682 | 3.123     | 0.812 | 0.000  | 0.001  | 0.002     | -0.014 | 0.005 | 0.274    | 0.007           | 0.004 | 0.003 |
| Going concern opinions | 4,653  | 8.350  | 3.893     | 0.804 | 0.015  | 0.015  | 0.002     | 0.004  | 0.023 | 1.000    | 0.913           | 0.761 | 0.207 |

Panel D: Matching without replacement – Big N versus Small Auditors

| Audit quality measure  | Nobs  | Reuse | Std. Bias | L1    | Mean   | Median | Std. Dev. | Range  |        | PCT Sign | PCT Significant |       |       |
|------------------------|-------|-------|-----------|-------|--------|--------|-----------|--------|--------|----------|-----------------|-------|-------|
|                        |       |       |           |       |        |        |           | Min.   | Max.   |          | 10%             | 5%    | 1%    |
| Absolute DAC           | 2,419 | 1.000 | 2.516     | 0.764 | -0.013 | -0.013 | 0.001     | -0.018 | -0.008 | 1.000    | 1.000           | 1.000 | 1.000 |
| Income-increasing DAC  | 1,295 | 1.000 | 2.929     | 0.775 | -0.012 | -0.012 | 0.002     | -0.017 | -0.007 | 1.000    | 0.999           | 0.999 | 0.976 |
| Restatements           | 2,418 | 1.000 | 2.557     | 0.764 | -0.008 | -0.008 | 0.002     | -0.018 | 0.002  | 0.997    | 0.705           | 0.522 | 0.182 |
| Going concern opinions | 1,070 | 1.000 | 2.702     | 0.751 | 0.035  | 0.035  | 0.004     | 0.021  | 0.049  | 1.000    | 1.000           | 0.999 | 0.945 |

Panel E: Matching with replacement – Big N versus Small Auditors

| Audit quality measure  | Nobs  | Reuse | Std. Bias | L1    | Mean   | Median | Std. Dev. | Range  |        | PCT Sign | PCT Significant |       |       |
|------------------------|-------|-------|-----------|-------|--------|--------|-----------|--------|--------|----------|-----------------|-------|-------|
|                        |       |       |           |       |        |        |           | Min.   | Max.   |          | 10%             | 5%    | 1%    |
| Absolute DAC           | 9,471 | 7.722 | 4.141     | 0.842 | -0.013 | -0.013 | 0.002     | -0.026 | -0.004 | 1.000    | 0.999           | 0.999 | 0.993 |
| Income-increasing DAC  | 5,526 | 8.291 | 5.195     | 0.858 | -0.015 | -0.015 | 0.002     | -0.024 | -0.001 | 1.000    | 0.997           | 0.997 | 0.990 |
| Restatements           | 9,489 | 7.713 | 4.196     | 0.842 | -0.007 | -0.007 | 0.003     | -0.038 | 0.008  | 0.986    | 0.481           | 0.324 | 0.104 |
| Going concern opinions | 3,818 | 6.773 | 5.317     | 0.838 | 0.021  | 0.021  | 0.003     | 0.010  | 0.035  | 1.000    | 0.982           | 0.930 | 0.500 |

*Standardized bias test*

Panel A: Effect of Matching Method on the Representation of Second Tier Firms

| Audit quality measure  | Before matching | Matching without replacement | Matching with replacement |
|------------------------|-----------------|------------------------------|---------------------------|
| Absolute DAC           | 0.472           | 0.559                        | 0.663                     |
| Income-increasing DAC  | 0.463           | 0.546                        | 0.666                     |
| Restatements           | 0.472           | 0.559                        | 0.661                     |
| Going concern opinions | 0.429           | 0.500                        | 0.567                     |

Panel B: Matching without replacement – Big N versus Second Tier

| Audit quality measure  | Nobs  | Reuse | Std. Bias | L1    | Mean   | Median | Std. Dev. | Range  |       | PCT Sign | PCT Significant |       |       |
|------------------------|-------|-------|-----------|-------|--------|--------|-----------|--------|-------|----------|-----------------|-------|-------|
|                        |       |       |           |       |        |        |           | Min.   | Max.  |          | 10%             | 5%    | 1%    |
| Absolute DAC           | 3,017 | 1.000 | 1.252     | 0.690 | -0.003 | -0.003 | 0.001     | -0.007 | 0.000 | 0.994    | 0.342           | 0.141 | 0.012 |
| Income-increasing DAC  | 1,498 | 1.000 | 1.317     | 0.715 | -0.002 | -0.002 | 0.001     | -0.009 | 0.003 | 0.958    | 0.129           | 0.042 | 0.003 |
| Restatements           | 3,028 | 1.000 | 1.251     | 0.690 | -0.005 | -0.005 | 0.002     | -0.011 | 0.005 | 0.987    | 0.448           | 0.261 | 0.074 |
| Going concern opinions | 1,087 | 1.000 | 1.351     | 0.691 | 0.015  | 0.015  | 0.004     | -0.004 | 0.030 | 0.998    | 0.588           | 0.223 | 0.003 |

Panel C: Matching with replacement – Big N versus Second Tier

| Audit quality measure  | Nobs  | Reuse | Std. Bias | L1    | Mean   | Median | Std. Dev. | Range  |       | PCT Sign | PCT Significant |       |       |
|------------------------|-------|-------|-----------|-------|--------|--------|-----------|--------|-------|----------|-----------------|-------|-------|
|                        |       |       |           |       |        |        |           | Min.   | Max.  |          | 10%             | 5%    | 1%    |
| Absolute DAC           | 8,623 | 6.460 | 1.276     | 0.752 | -0.002 | -0.002 | 0.001     | -0.011 | 0.003 | 0.926    | 0.261           | 0.117 | 0.008 |
| Income-increasing DAC  | 5,402 | 7.632 | 1.286     | 0.785 | -0.002 | -0.002 | 0.002     | -0.014 | 0.005 | 0.867    | 0.192           | 0.076 | 0.005 |
| Restatements           | 8,856 | 6.493 | 1.281     | 0.752 | -0.002 | -0.001 | 0.003     | -0.025 | 0.008 | 0.665    | 0.049           | 0.023 | 0.007 |
| Going concern opinions | 3,013 | 5.840 | 1.408     | 0.748 | 0.014  | 0.014  | 0.004     | -0.006 | 0.028 | 0.996    | 0.670           | 0.418 | 0.066 |

Panel D: Matching without replacement – Big N versus Small Auditors

| Audit quality measure  | Nobs  | Reuse | Std. Bias | L1    | Mean   | Median | Std. Dev. | Range  |        | PCT Sign | PCT Significant |       |       |
|------------------------|-------|-------|-----------|-------|--------|--------|-----------|--------|--------|----------|-----------------|-------|-------|
|                        |       |       |           |       |        |        |           | Min.   | Max.   |          | 10%             | 5%    | 1%    |
| Absolute DAC           | 2,272 | 1.000 | 1.322     | 0.769 | -0.013 | -0.013 | 0.002     | -0.020 | -0.007 | 1.000    | 0.999           | 0.998 | 0.995 |
| Income-increasing DAC  | 1,226 | 1.000 | 1.347     | 0.780 | -0.012 | -0.012 | 0.002     | -0.024 | -0.005 | 1.000    | 0.995           | 0.995 | 0.964 |
| Restatements           | 2,276 | 1.000 | 1.347     | 0.768 | -0.008 | -0.008 | 0.003     | -0.018 | 0.004  | 0.994    | 0.653           | 0.476 | 0.182 |
| Going concern opinions | 1,041 | 1.000 | 1.340     | 0.744 | 0.034  | 0.034  | 0.005     | 0.011  | 0.051  | 1.000    | 0.997           | 0.987 | 0.848 |

Panel E: Matching with replacement – Big N versus Small Auditors

| Audit quality measure  | Nobs  | Reuse | Std. Bias | L1    | Mean   | Median | Std. Dev. | Range  |       | PCT Sign | PCT Significant |       |       |
|------------------------|-------|-------|-----------|-------|--------|--------|-----------|--------|-------|----------|-----------------|-------|-------|
|                        |       |       |           |       |        |        |           | Min.   | Max.  |          | 10%             | 5%    | 1%    |
| Absolute DAC           | 4,115 | 3.971 | 1.275     | 0.806 | -0.013 | -0.013 | 0.002     | -0.024 | 0.002 | 0.999    | 0.991           | 0.989 | 0.975 |
| Income-increasing DAC  | 2,981 | 4.893 | 1.304     | 0.828 | -0.014 | -0.014 | 0.002     | -0.025 | 0.009 | 0.999    | 0.993           | 0.990 | 0.964 |
| Restatements           | 4,347 | 4.115 | 1.286     | 0.805 | -0.008 | -0.008 | 0.004     | -0.021 | 0.007 | 0.985    | 0.595           | 0.408 | 0.145 |
| Going concern opinions | 2,399 | 4.520 | 1.385     | 0.789 | 0.023  | 0.023  | 0.004     | 0.008  | 0.039 | 1.000    | 0.973           | 0.916 | 0.553 |

**IE Table 5 Descriptive Statistics Post-SOX Analysis: Coarsened Exact Matching**

| <i>Goodness-of-fit test</i> |       |       |           |        |        |           |        |        |          |                 |       |       |
|-----------------------------|-------|-------|-----------|--------|--------|-----------|--------|--------|----------|-----------------|-------|-------|
| Audit quality measure       | Nobs  | Mean  | Std. Bias | L1     | Median | Std. Dev. | Range  |        | PCT Sign | PCT Significant |       |       |
|                             |       |       |           |        |        |           | Min.   | Max.   |          | 10%             | 5%    | 1%    |
| Absolute DAC                | 8,310 | 1.194 | 0.591     | -0.005 | -0.005 | 0.001     | -0.009 | -0.001 | 1.000    | 0.983           | 0.931 | 0.565 |
| Income-increasing DAC       | 4,241 | 1.539 | 0.615     | -0.005 | -0.005 | 0.001     | -0.010 | -0.001 | 1.000    | 0.982           | 0.934 | 0.619 |
| Restatements                | 8,290 | 1.177 | 0.591     | 0.000  | 0.000  | 0.002     | -0.007 | 0.009  | 0.367    | 0.002           | 0.000 | 0.000 |
| Going concern opinions      | 2,397 | 1.895 | 0.564     | 0.017  | 0.017  | 0.003     | 0.006  | 0.027  | 1.000    | 0.954           | 0.869 | 0.463 |

  

| <i>Standardized bias test</i> |       |       |           |        |        |           |        |        |          |                 |       |       |
|-------------------------------|-------|-------|-----------|--------|--------|-----------|--------|--------|----------|-----------------|-------|-------|
| Audit quality measure         | Nobs  | Mean  | Std. Bias | L1     | Median | Std. Dev. | Range  |        | PCT Sign | PCT Significant |       |       |
|                               |       |       |           |        |        |           | Min.   | Max.   |          | 10%             | 5%    | 1%    |
| Absolute DAC                  | 7,242 | 0.903 | 0.557     | -0.005 | -0.005 | 0.001     | -0.009 | -0.001 | 1.000    | 0.980           | 0.930 | 0.577 |
| Income-increasing DAC         | 3,400 | 0.973 | 0.559     | -0.006 | -0.006 | 0.001     | -0.010 | -0.002 | 1.000    | 0.981           | 0.922 | 0.592 |
| Restatements                  | 7,270 | 0.900 | 0.559     | 0.000  | 0.000  | 0.002     | -0.007 | 0.008  | 0.367    | 0.003           | 0.000 | 0.000 |
| Going concern opinions        | 2,008 | 1.378 | 0.518     | 0.017  | 0.017  | 0.003     | 0.002  | 0.026  | 1.000    | 0.861           | 0.683 | 0.242 |

**IE Table 6 Descriptive Statistics Post-SOX Analysis: Efficient Frontier**

| <i>Goodness-of-fit test</i>           |        |       |           |       |        |        |           |        |        |          |                 |       |       |
|---------------------------------------|--------|-------|-----------|-------|--------|--------|-----------|--------|--------|----------|-----------------|-------|-------|
| Panel A: Matching without replacement |        |       |           |       |        |        |           |        |        |          |                 |       |       |
| Audit quality measure                 | Nobs   | Reuse | Std. Bias | L1    | Mean   | Median | Std. Dev. | Range  |        | PCT Sign | PCT Significant |       |       |
|                                       |        |       |           |       |        |        |           | Min.   | Max.   |          | 10%             | 5%    | 1%    |
| Absolute DAC                          | 4,507  | 1.000 | 2.031     | 0.676 | -0.007 | -0.007 | 0.001     | -0.009 | -0.005 | 1.000    | 1.000           | 1.000 | 1.000 |
| Income-increasing DAC                 | 2,382  | 1.000 | 2.261     | 0.700 | -0.007 | -0.007 | 0.001     | -0.009 | -0.004 | 1.000    | 1.000           | 0.986 | 0.942 |
| Restatements                          | 4,471  | 1.000 | 1.941     | 0.676 | -0.005 | -0.006 | 0.002     | -0.010 | -0.002 | 1.000    | 0.622           | 0.473 | 0.176 |
| Going concern opinions                | 1,753  | 1.000 | 1.905     | 0.629 | 0.023  | 0.022  | 0.003     | 0.015  | 0.029  | 1.000    | 1.000           | 1.000 | 0.986 |
| Panel B: Matching with replacement    |        |       |           |       |        |        |           |        |        |          |                 |       |       |
| Audit quality measure                 | Nobs   | Reuse | Std. Bias | L1    | Mean   | Median | Std. Dev. | Range  |        | PCT Sign | PCT Significant |       |       |
|                                       |        |       |           |       |        |        |           | Min.   | Max.   |          | 10%             | 5%    | 1%    |
| Absolute DAC                          | 13,122 | 7.157 | 2.445     | 0.749 | -0.005 | -0.004 | 0.001     | -0.012 | -0.002 | 1.000    | 0.949           | 0.869 | 0.576 |
| Income-increasing DAC                 | 8,537  | 7.801 | 3.304     | 0.808 | -0.004 | -0.005 | 0.001     | -0.007 | -0.001 | 1.000    | 0.909           | 0.778 | 0.394 |
| Restatements                          | 13,414 | 7.189 | 2.469     | 0.751 | -0.002 | -0.001 | 0.002     | -0.010 | 0.001  | 0.724    | 0.041           | 0.020 | 0.010 |
| Going concern opinions                | 4,500  | 5.875 | 3.599     | 0.745 | 0.017  | 0.017  | 0.002     | 0.013  | 0.021  | 1.000    | 1.000           | 1.000 | 0.910 |
| <i>Standardized bias test</i>         |        |       |           |       |        |        |           |        |        |          |                 |       |       |
| Panel A: Matching without replacement |        |       |           |       |        |        |           |        |        |          |                 |       |       |
| Audit quality measure                 | Nobs   | Reuse | Std. Bias | L1    | Mean   | Median | Std. Dev. | Range  |        | PCT Sign | PCT Significant |       |       |
|                                       |        |       |           |       |        |        |           | Min.   | Max.   |          | 10%             | 5%    | 1%    |
| Absolute DAC                          | 4,416  | 1.000 | 1.392     | 0.675 | -0.007 | -0.007 | 0.001     | -0.010 | -0.004 | 1.000    | 1.000           | 1.000 | 0.986 |
| Income-increasing DAC                 | 2,299  | 1.000 | 1.327     | 0.699 | -0.007 | -0.007 | 0.001     | -0.009 | -0.004 | 1.000    | 1.000           | 1.000 | 0.907 |
| Restatements                          | 4,435  | 1.000 | 1.444     | 0.675 | -0.005 | -0.005 | 0.002     | -0.013 | -0.002 | 1.000    | 0.662           | 0.446 | 0.216 |
| Going concern opinions                | 1,718  | 1.000 | 1.207     | 0.631 | 0.023  | 0.023  | 0.003     | 0.017  | 0.030  | 1.000    | 1.000           | 0.986 | 0.946 |
| Panel B: Matching with replacement    |        |       |           |       |        |        |           |        |        |          |                 |       |       |
| Audit quality measure                 | Nobs   | Reuse | Std. Bias | L1    | Mean   | Median | Std. Dev. | Range  |        | PCT Sign | PCT Significant |       |       |
|                                       |        |       |           |       |        |        |           | Min.   | Max.   |          | 10%             | 5%    | 1%    |
| Absolute DAC                          | 8,812  | 5.054 | 1.270     | 0.719 | -0.006 | -0.005 | 0.001     | -0.009 | -0.002 | 1.000    | 0.960           | 0.960 | 0.820 |
| Income-increasing DAC                 | 5,612  | 6.056 | 1.229     | 0.752 | -0.007 | -0.007 | 0.002     | -0.011 | -0.003 | 1.000    | 0.990           | 0.980 | 0.900 |
| Restatements                          | 8,683  | 4.879 | 1.237     | 0.718 | -0.003 | -0.003 | 0.003     | -0.010 | 0.004  | 0.820    | 0.230           | 0.070 | 0.030 |
| Going concern opinions                | 3,120  | 4.540 | 1.245     | 0.700 | 0.018  | 0.018  | 0.003     | 0.012  | 0.035  | 1.000    | 0.990           | 0.930 | 0.790 |

**IE Table 7 Descriptive Statistics Post-SOX Analysis: Five Additional Matching Variables**

| <i>Goodness-of-fit test</i>           |        |       |           |       |        |        |           |        |        |          |                 |       |       |
|---------------------------------------|--------|-------|-----------|-------|--------|--------|-----------|--------|--------|----------|-----------------|-------|-------|
| Panel A: Matching without replacement |        |       |           |       |        |        |           |        |        |          |                 |       |       |
| Audit quality measure                 | Nobs   | Reuse | Std. Bias | L1    | Mean   | Median | Std. Dev. | Range  |        | PCT Sign | PCT Significant |       |       |
|                                       |        |       |           |       |        |        |           | Min.   | Max.   |          | 10%             | 5%    | 1%    |
| Absolute DAC                          | 4,432  | 1.000 | 1.563     | 0.987 | -0.007 | -0.007 | 0.001     | -0.010 | -0.003 | 1.000    | 1.000           | 0.999 | 0.987 |
| Income-increasing DAC                 | 2,292  | 1.000 | 2.084     | 0.962 | -0.009 | -0.009 | 0.001     | -0.013 | -0.005 | 1.000    | 0.999           | 0.999 | 0.998 |
| Restatements                          | 4,390  | 1.000 | 1.459     | 0.914 | -0.006 | -0.006 | 0.002     | -0.011 | 0.002  | 0.999    | 0.773           | 0.607 | 0.236 |
| Going concern opinions                | 1,697  | 1.000 | 1.983     | 0.979 | 0.024  | 0.025  | 0.003     | 0.013  | 0.040  | 1.000    | 0.999           | 0.999 | 0.985 |
| Panel B: Matching with replacement    |        |       |           |       |        |        |           |        |        |          |                 |       |       |
| Audit quality measure                 | Nobs   | Reuse | Std. Bias | L1    | Mean   | Median | Std. Dev. | Range  |        | PCT Sign | PCT Significant |       |       |
|                                       |        |       |           |       |        |        |           | Min.   | Max.   |          | 10%             | 5%    | 1%    |
| Absolute DAC                          | 15,702 | 6.712 | 3.155     | 0.994 | -0.004 | -0.004 | 0.001     | -0.010 | 0.000  | 0.996    | 0.801           | 0.633 | 0.272 |
| Income-increasing DAC                 | 6,721  | 5.869 | 3.504     | 0.981 | -0.008 | -0.007 | 0.002     | -0.020 | 0.001  | 0.999    | 0.982           | 0.937 | 0.722 |
| Restatements                          | 13,592 | 6.085 | 2.877     | 0.954 | -0.001 | -0.001 | 0.003     | -0.016 | 0.005  | 0.509    | 0.106           | 0.062 | 0.017 |
| Going concern opinions                | 4,603  | 5.084 | 3.855     | 0.990 | 0.018  | 0.018  | 0.002     | -0.001 | 0.027  | 0.999    | 0.996           | 0.983 | 0.852 |
| <i>Standardized bias test</i>         |        |       |           |       |        |        |           |        |        |          |                 |       |       |
| Panel A: Matching without replacement |        |       |           |       |        |        |           |        |        |          |                 |       |       |
| Audit quality measure                 | Nobs   | Reuse | Std. Bias | L1    | Mean   | Median | Std. Dev. | Range  |        | PCT Sign | PCT Significant |       |       |
|                                       |        |       |           |       |        |        |           | Min.   | Max.   |          | 10%             | 5%    | 1%    |
| Absolute DAC                          | 4,399  | 1.000 | 1.108     | 0.987 | -0.007 | -0.007 | 0.001     | -0.010 | -0.003 | 1.000    | 1.000           | 1.000 | 0.989 |
| Income-increasing DAC                 | 2,271  | 1.000 | 1.210     | 0.988 | -0.007 | -0.007 | 0.001     | -0.011 | -0.004 | 1.000    | 1.000           | 0.999 | 0.963 |
| Restatements                          | 4,304  | 1.000 | 1.221     | 0.992 | -0.005 | -0.005 | 0.002     | -0.011 | 0.001  | 0.998    | 0.628           | 0.446 | 0.167 |
| Going concern opinions                | 1,610  | 1.000 | 1.249     | 0.998 | 0.025  | 0.025  | 0.003     | 0.012  | 0.039  | 1.000    | 1.000           | 0.998 | 0.967 |
| Panel B: Matching with replacement    |        |       |           |       |        |        |           |        |        |          |                 |       |       |
| Audit quality measure                 | Nobs   | Reuse | Std. Bias | L1    | Mean   | Median | Std. Dev. | Range  |        | PCT Sign | PCT Significant |       |       |
|                                       |        |       |           |       |        |        |           | Min.   | Max.   |          | 10%             | 5%    | 1%    |
| Absolute DAC                          | 9,120  | 4.303 | 1.194     | 0.990 | -0.006 | -0.006 | 0.001     | -0.011 | -0.001 | 1.000    | 0.990           | 0.978 | 0.857 |
| Income-increasing DAC                 | 5,173  | 4.548 | 1.241     | 0.992 | -0.007 | -0.007 | 0.001     | -0.012 | -0.002 | 1.000    | 0.996           | 0.992 | 0.921 |
| Restatements                          | 9,076  | 4.421 | 1.197     | 0.994 | -0.001 | -0.001 | 0.003     | -0.015 | 0.006  | 0.582    | 0.094           | 0.050 | 0.013 |
| Going concern opinions                | 2,782  | 3.428 | 1.352     | 0.998 | 0.022  | 0.021  | 0.003     | 0.010  | 0.033  | 1.000    | 0.997           | 0.986 | 0.888 |

*Notes.* This appendix repeats the analyses presented in the manuscript after imposing two alternative covariate balance criteria. For the panels and tables labeled *Goodness-of-fit test* we classify matched samples as balanced when a Wald test cannot reject the null hypothesis that the matching variables do not explain the use of a Big *N* auditor ( $p > 10\%$ , two-tailed), and for the table labeled *Standardized bias test* we classify matched samples as balanced when the absolute standardized bias is smaller than 3% for all matching covariates.

## Internet Appendix IF: Post-SOX Analysis – Varying the Number of Iterations

*Test of significance*

### Panel A: 2,000 Iterations – Matching without replacement

| Audit quality measure  | Nobs  | Reuse | Std. Bias | L1    | Mean   | Median | Std. Dev. | Range  |        | PCT Sign | PCT Significant |       |       |
|------------------------|-------|-------|-----------|-------|--------|--------|-----------|--------|--------|----------|-----------------|-------|-------|
|                        |       |       |           |       |        |        |           | Min.   | Max.   |          | 10%             | 5%    | 1%    |
| Absolute DAC           | 4,467 | 1.000 | 1.550     | 0.693 | -0.007 | -0.007 | 0.001     | -0.010 | 0.002  | 0.999    | 0.998           | 0.998 | 0.996 |
| Income-increasing DAC  | 2,368 | 1.000 | 1.788     | 0.717 | -0.007 | -0.007 | 0.001     | -0.014 | -0.004 | 1.000    | 0.999           | 0.998 | 0.972 |
| Restatements           | 4,464 | 1.000 | 1.527     | 0.693 | -0.006 | -0.006 | 0.002     | -0.011 | 0.001  | 0.993    | 0.722           | 0.531 | 0.224 |
| Going concern opinions | 1,758 | 1.000 | 1.671     | 0.643 | 0.023  | 0.023  | 0.003     | 0.014  | 0.035  | 1.000    | 0.999           | 0.999 | 0.976 |

### Panel B: 2,000 Iterations – Matching with replacement

| Audit quality measure  | Nobs  | Reuse | Std. Bias | L1    | Mean   | Median | Std. Dev. | Range  |       | PCT Sign | PCT Significant |       |       |
|------------------------|-------|-------|-----------|-------|--------|--------|-----------|--------|-------|----------|-----------------|-------|-------|
|                        |       |       |           |       |        |        |           | Min.   | Max.  |          | 10%             | 5%    | 1%    |
| Absolute DAC           | 4,563 | 2.984 | 1.886     | 0.740 | -0.007 | -0.006 | 0.003     | -0.034 | 0.012 | 0.983    | 0.887           | 0.850 | 0.742 |
| Income-increasing DAC  | 4,096 | 4.020 | 1.854     | 0.766 | -0.007 | -0.007 | 0.003     | -0.027 | 0.008 | 0.992    | 0.922           | 0.887 | 0.746 |
| Restatements           | 5,177 | 3.175 | 1.531     | 0.729 | -0.004 | -0.004 | 0.004     | -0.028 | 0.010 | 0.881    | 0.237           | 0.156 | 0.063 |
| Going concern opinions | 3,106 | 3.637 | 1.817     | 0.722 | 0.018  | 0.018  | 0.004     | -0.004 | 0.034 | 0.997    | 0.956           | 0.911 | 0.702 |

### Panel C: 5,000 Iterations – Matching without replacement

| Audit quality measure  | Nobs  | Reuse | Std. Bias | L1    | Mean   | Median | Std. Dev. | Range  |        | PCT Sign | PCT Significant |       |       |
|------------------------|-------|-------|-----------|-------|--------|--------|-----------|--------|--------|----------|-----------------|-------|-------|
|                        |       |       |           |       |        |        |           | Min.   | Max.   |          | 10%             | 5%    | 1%    |
| Absolute DAC           | 4,461 | 1.000 | 1.547     | 0.693 | -0.007 | -0.007 | 0.001     | -0.010 | 0.014  | 0.999    | 0.998           | 0.997 | 0.996 |
| Income-increasing DAC  | 2,365 | 1.000 | 1.805     | 0.717 | -0.007 | -0.007 | 0.001     | -0.014 | -0.003 | 1.000    | 0.999           | 0.997 | 0.975 |
| Restatements           | 4,464 | 1.000 | 1.522     | 0.693 | -0.006 | -0.006 | 0.002     | -0.013 | 0.002  | 0.994    | 0.706           | 0.517 | 0.202 |
| Going concern opinions | 1,762 | 1.000 | 1.682     | 0.643 | 0.023  | 0.023  | 0.003     | 0.012  | 0.035  | 1.000    | 1.000           | 0.998 | 0.980 |

### Panel D: 5,000 Iterations – Matching with replacement

| Audit quality measure  | Nobs  | Reuse | Std. Bias | L1    | Mean   | Median | Std. Dev. | Range  |       | PCT Sign | PCT Significant |       |       |
|------------------------|-------|-------|-----------|-------|--------|--------|-----------|--------|-------|----------|-----------------|-------|-------|
|                        |       |       |           |       |        |        |           | Min.   | Max.  |          | 10%             | 5%    | 1%    |
| Absolute DAC           | 4,628 | 3.007 | 1.865     | 0.74  | -0.007 | -0.006 | 0.003     | -0.034 | 0.012 | 0.984    | 0.891           | 0.857 | 0.742 |
| Income-increasing DAC  | 4,043 | 3.949 | 1.877     | 0.765 | -0.007 | -0.007 | 0.003     | -0.027 | 0.011 | 0.986    | 0.915           | 0.874 | 0.731 |
| Restatements           | 5,172 | 3.129 | 1.497     | 0.729 | -0.004 | -0.004 | 0.004     | -0.038 | 0.011 | 0.879    | 0.244           | 0.161 | 0.06  |
| Going concern opinions | 3,075 | 3.622 | 1.807     | 0.721 | 0.018  | 0.018  | 0.004     | -0.004 | 0.036 | 0.998    | 0.952           | 0.907 | 0.696 |

*Goodness-of-fit test*

Panel A: 2,000 Iterations – Matching without replacement

| Audit quality measure  | Nobs  | Reuse | Std. Bias | L1    | Mean   | Median | Std. Dev. | Range  |        | PCT Sign | PCT Significant |       |       |
|------------------------|-------|-------|-----------|-------|--------|--------|-----------|--------|--------|----------|-----------------|-------|-------|
|                        |       |       |           |       |        |        |           | Min.   | Max.   |          | 10%             | 5%    | 1%    |
| Absolute DAC           | 4,506 | 1.000 | 1.964     | 0.693 | -0.007 | -0.007 | 0.001     | -0.009 | -0.004 | 1.000    | 1.000           | 1.000 | 1.000 |
| Income-increasing DAC  | 2,379 | 1.000 | 2.266     | 0.716 | -0.007 | -0.007 | 0.001     | -0.011 | -0.004 | 1.000    | 1.000           | 1.000 | 0.987 |
| Restatements           | 4,496 | 1.000 | 1.951     | 0.693 | -0.005 | -0.006 | 0.002     | -0.012 | 0.000  | 0.999    | 0.687           | 0.524 | 0.190 |
| Going concern opinions | 1,766 | 1.000 | 2.061     | 0.643 | 0.023  | 0.023  | 0.003     | 0.013  | 0.031  | 1.000    | 1.000           | 0.999 | 0.982 |

Panel B: 2,000 Iterations – Matching with replacement

| Audit quality measure  | Nobs   | Reuse | Std. Bias | L1    | Mean   | Median | Std. Dev. | Range  |        | PCT Sign | PCT Significant |       |       |
|------------------------|--------|-------|-----------|-------|--------|--------|-----------|--------|--------|----------|-----------------|-------|-------|
|                        |        |       |           |       |        |        |           | Min.   | Max.   |          | 10%             | 5%    | 1%    |
| Absolute DAC           | 14,211 | 6.176 | 2.872     | 0.774 | -0.004 | -0.003 | 0.002     | -0.011 | 0.000  | 0.997    | 0.809           | 0.646 | 0.342 |
| Income-increasing DAC  | 8,873  | 7.178 | 3.485     | 0.821 | -0.004 | -0.004 | 0.001     | -0.009 | -0.001 | 1.000    | 0.904           | 0.740 | 0.243 |
| Restatements           | 14,485 | 6.256 | 2.862     | 0.774 | -0.001 | -0.001 | 0.002     | -0.013 | 0.004  | 0.534    | 0.065           | 0.029 | 0.007 |
| Going concern opinions | 4,675  | 4.979 | 3.911     | 0.764 | 0.017  | 0.017  | 0.002     | 0.005  | 0.025  | 1.000    | 0.996           | 0.987 | 0.872 |

Panel C: 5,000 Iterations – Matching without replacement

| Audit quality measure  | Nobs  | Reuse | Std. Bias | L1    | Mean   | Median | Std. Dev. | Range  |        | PCT Sign | PCT Significant |       |       |
|------------------------|-------|-------|-----------|-------|--------|--------|-----------|--------|--------|----------|-----------------|-------|-------|
|                        |       |       |           |       |        |        |           | Min.   | Max.   |          | 10%             | 5%    | 1%    |
| Absolute DAC           | 4,505 | 1.000 | 1.965     | 0.693 | -0.007 | -0.007 | 0.001     | -0.010 | -0.004 | 1.000    | 1.000           | 1.000 | 0.998 |
| Income-increasing DAC  | 2,380 | 1.000 | 2.269     | 0.716 | -0.007 | -0.007 | 0.001     | -0.011 | -0.004 | 1.000    | 1.000           | 0.999 | 0.985 |
| Restatements           | 4,505 | 1.000 | 1.964     | 0.694 | -0.006 | -0.006 | 0.002     | -0.016 | 0.001  | 0.994    | 0.703           | 0.531 | 0.197 |
| Going concern opinions | 1,765 | 1.000 | 2.048     | 0.643 | 0.023  | 0.023  | 0.003     | 0.013  | 0.032  | 1.000    | 1.000           | 0.999 | 0.975 |

Panel D: 5,000 Iterations – Matching with replacement

| Audit quality measure  | Nobs   | Reuse | Std. Bias | L1    | Mean   | Median | Std. Dev. | Range  |        | PCT Sign | PCT Significant |       |       |
|------------------------|--------|-------|-----------|-------|--------|--------|-----------|--------|--------|----------|-----------------|-------|-------|
|                        |        |       |           |       |        |        |           | Min.   | Max.   |          | 10%             | 5%    | 1%    |
| Absolute DAC           | 14,331 | 6.231 | 2.877     | 0.775 | -0.004 | -0.003 | 0.002     | -0.016 | 0.003  | 0.997    | 0.812           | 0.644 | 0.346 |
| Income-increasing DAC  | 8,859  | 7.199 | 3.493     | 0.820 | -0.004 | -0.004 | 0.001     | -0.011 | -0.001 | 1.000    | 0.905           | 0.739 | 0.237 |
| Restatements           | 14,440 | 6.220 | 2.854     | 0.774 | -0.001 | -0.001 | 0.002     | -0.022 | 0.006  | 0.533    | 0.069           | 0.037 | 0.008 |
| Going concern opinions | 4,673  | 5.005 | 3.895     | 0.764 | 0.017  | 0.017  | 0.002     | 0.005  | 0.026  | 1.000    | 0.997           | 0.990 | 0.856 |

*Standardized bias test*

Panel A: 2,000 Iterations – Matching without replacement

| Audit quality measure  | Nobs  | Reuse | Std. Bias | L1    | Mean   | Median | Std. Dev. | Range  |        | PCT Sign | PCT Significant |       |       |
|------------------------|-------|-------|-----------|-------|--------|--------|-----------|--------|--------|----------|-----------------|-------|-------|
|                        |       |       |           |       |        |        |           | Min.   | Max.   |          | 10%             | 5%    | 1%    |
| Absolute DAC           | 4,428 | 1.000 | 1.414     | 0.693 | -0.007 | -0.007 | 0.001     | -0.010 | -0.004 | 1.000    | 1.000           | 0.999 | 0.995 |
| Income-increasing DAC  | 2,309 | 1.000 | 1.294     | 0.717 | -0.007 | -0.007 | 0.001     | -0.011 | -0.003 | 1.000    | 0.997           | 0.994 | 0.970 |
| Restatements           | 4,437 | 1.000 | 1.413     | 0.693 | -0.006 | -0.006 | 0.002     | -0.014 | 0.000  | 0.994    | 0.702           | 0.511 | 0.205 |
| Going concern opinions | 1,739 | 1.000 | 1.279     | 0.645 | 0.023  | 0.023  | 0.003     | 0.013  | 0.034  | 1.000    | 0.999           | 0.997 | 0.952 |

Panel B: 2,000 Iterations – Matching with replacement

| Audit quality measure  | Nobs  | Reuse | Std. Bias | L1    | Mean   | Median | Std. Dev. | Range  |        | PCT Sign | PCT Significant |       |       |
|------------------------|-------|-------|-----------|-------|--------|--------|-----------|--------|--------|----------|-----------------|-------|-------|
|                        |       |       |           |       |        |        |           | Min.   | Max.   |          | 10%             | 5%    | 1%    |
| Absolute DAC           | 9,099 | 4.343 | 1.310     | 0.737 | -0.006 | -0.006 | 0.002     | -0.014 | -0.002 | 1.000    | 0.969           | 0.944 | 0.770 |
| Income-increasing DAC  | 6,005 | 5.159 | 1.245     | 0.775 | -0.006 | -0.006 | 0.002     | -0.019 | -0.001 | 1.000    | 0.977           | 0.954 | 0.771 |
| Restatements           | 8,803 | 4.341 | 1.288     | 0.736 | -0.003 | -0.003 | 0.003     | -0.020 | 0.007  | 0.822    | 0.204           | 0.135 | 0.050 |
| Going concern opinions | 3,301 | 3.798 | 1.355     | 0.724 | 0.018  | 0.018  | 0.003     | 0.002  | 0.034  | 1.000    | 0.970           | 0.937 | 0.760 |

Panel C: 5,000 Iterations – Matching without replacement

| Audit quality measure  | Nobs  | Reuse | Std. Bias | L1    | Mean   | Median | Std. Dev. | Range  |       | PCT Sign | PCT Significant |       |       |
|------------------------|-------|-------|-----------|-------|--------|--------|-----------|--------|-------|----------|-----------------|-------|-------|
|                        |       |       |           |       |        |        |           | Min.   | Max.  |          | 10%             | 5%    | 1%    |
| Absolute DAC           | 4,430 | 1.000 | 1.416     | 0.693 | -0.007 | -0.007 | 0.001     | -0.010 | 0.002 | 1.000    | 0.999           | 0.998 | 0.994 |
| Income-increasing DAC  | 2,307 | 1.000 | 1.300     | 0.718 | -0.007 | -0.007 | 0.001     | -0.019 | 0.004 | 1.000    | 0.997           | 0.994 | 0.965 |
| Restatements           | 4,431 | 1.000 | 1.417     | 0.693 | -0.006 | -0.006 | 0.002     | -0.014 | 0.003 | 0.993    | 0.690           | 0.514 | 0.207 |
| Going concern opinions | 1,737 | 1.000 | 1.281     | 0.645 | 0.023  | 0.023  | 0.003     | -0.005 | 0.035 | 1.000    | 0.998           | 0.994 | 0.951 |

Panel D: 5,000 Iterations – Matching with replacement

| Audit quality measure  | Nobs  | Reuse | Std. Bias | L1    | Mean   | Median | Std. Dev. | Range  |        | PCT Sign | PCT Significant |       |       |
|------------------------|-------|-------|-----------|-------|--------|--------|-----------|--------|--------|----------|-----------------|-------|-------|
|                        |       |       |           |       |        |        |           | Min.   | Max.   |          | 10%             | 5%    | 1%    |
| Absolute DAC           | 9,072 | 4.341 | 1.306     | 0.737 | -0.006 | -0.006 | 0.002     | -0.014 | -0.001 | 1.000    | 0.972           | 0.946 | 0.772 |
| Income-increasing DAC  | 6,028 | 5.137 | 1.232     | 0.775 | -0.006 | -0.006 | 0.002     | -0.024 | 0.003  | 0.999    | 0.981           | 0.952 | 0.763 |
| Restatements           | 8,897 | 4.364 | 1.276     | 0.736 | -0.003 | -0.003 | 0.003     | -0.020 | 0.007  | 0.812    | 0.206           | 0.128 | 0.040 |
| Going concern opinions | 3,299 | 3.794 | 1.346     | 0.724 | 0.018  | 0.018  | 0.003     | 0.002  | 0.037  | 1.000    | 0.972           | 0.937 | 0.762 |

*Notes.* This appendix repeats the analysis presented in Figure 2 after varying the number of iterations. Panels A and B present the results of 2,000 iterations and Panels C and D present the results of 5,000 iterations. *Nobs* equals the average number of treatment firms retained in matched samples, *Reuse* equals the average of the average number of times included control firms are matched to treatment firms, *Std. Bias* equals the average of the average of the absolute standardized percentage bias across all covariates, *L1* equals the average multivariate *L1*, *PCT Sign* is the fraction of treatment effects that are in the predicted direction, and *PCT Significant* is the fraction of treatment effects that are in the predicted direction and significant at either  $p < 10\%$ ,  $p < 5\%$ , or  $p < 1\%$  (two-tailed). For the table labeled *Test of significance* we classify matched samples as balanced when univariate t-tests cannot reject the null hypothesis that the means of the matching variables do not differ between Big N and non-Big N clients ( $p > 10\%$ , two-tailed), for the table labeled *Goodness-of-fit test* we classify matched samples as balanced when a Wald test cannot reject the null hypothesis that the matching variables do not explain the use of a Big N auditor ( $p >$

10%, two-tailed), and for the table labeled *Standardized bias test* we classify matched samples as balanced when the absolute standardized bias is smaller than 3% for all matching covariates. We estimate all regressions using probability weights derived from the matching procedure and cluster standard errors at the firm level (Dehejia and Wahba 2002).

## Internet Appendix IG: Bootstrapping

### *Test of significance*

#### Panel A: LMZ Replication

| Audit quality measure | Matching without replacement |           | Matching with replacement |           |
|-----------------------|------------------------------|-----------|---------------------------|-----------|
|                       | Mean                         | Median    | Mean                      | Median    |
| Absolute DAC          | -0.004***                    | -0.004*** | -0.005***                 | -0.005*** |

#### Panel B: Post-SOX Analysis

| Audit quality measure  | Matching without replacement |           | Matching with replacement |           |
|------------------------|------------------------------|-----------|---------------------------|-----------|
|                        | Mean                         | Median    | Mean                      | Median    |
| Absolute DAC           | -0.007***                    | -0.007*** | -0.006***                 | -0.006*** |
| Income-increasing DAC  | -0.007***                    | -0.007*** | -0.008***                 | -0.008*** |
| Restatements           | -0.006***                    | -0.005*** | -0.004***                 | -0.003*** |
| Going concern opinions | 0.012***                     | 0.011***  | 0.013***                  | 0.014***  |

### *Goodness-of-fit test*

#### Panel A: LMZ Replication

| Audit quality measure | Matching without replacement |           | Matching with replacement |           |
|-----------------------|------------------------------|-----------|---------------------------|-----------|
|                       | Mean                         | Median    | Mean                      | Median    |
| Absolute DAC          | -0.004***                    | -0.004*** | -0.005***                 | -0.005*** |

#### Panel B: Post-SOX Analysis

| Audit quality measure  | Matching without replacement |           | Matching with replacement |           |
|------------------------|------------------------------|-----------|---------------------------|-----------|
|                        | Mean                         | Median    | Mean                      | Median    |
| Absolute DAC           | -0.007***                    | -0.007*** | -0.005***                 | -0.005*** |
| Income-increasing DAC  | -0.008***                    | -0.007*** | -0.007***                 | -0.006*** |
| Restatements           | -0.006***                    | -0.006*** | -0.001***                 | 0.000**   |
| Going concern opinions | 0.012***                     | 0.012***  | 0.013***                  | 0.014***  |

| <i>Standardized bias test</i> |                              |           |                           |           |
|-------------------------------|------------------------------|-----------|---------------------------|-----------|
| Panel A: LMZ Replication      |                              |           |                           |           |
| Audit quality measure         | Matching without replacement |           | Matching with replacement |           |
|                               | Mean                         | Median    | Mean                      | Median    |
| Absolute DAC                  | -0.004***                    | -0.004*** | -0.005***                 | -0.005*** |

  

| Panel B: Post-SOX Analysis |                              |           |                           |           |
|----------------------------|------------------------------|-----------|---------------------------|-----------|
| Audit quality measure      | Matching without replacement |           | Matching with replacement |           |
|                            | Mean                         | Median    | Mean                      | Median    |
| Absolute DAC               | -0.007***                    | -0.007*** | -0.006***                 | -0.006*** |
| Income-increasing DAC      | -0.008***                    | -0.007*** | -0.008***                 | -0.008*** |
| Restatements               | -0.006***                    | -0.005*** | -0.003***                 | -0.002*** |
| Going concern opinions     | 0.011***                     | 0.011***  | 0.013***                  | 0.014***  |

*Notes.* This appendix presents statistical tests on Big N audit quality effects derived from an analysis that repeats the analyses presented in Figures 1 and 2 using bootstrapped samples. In order to take the panel structure of the original data into account, we randomly draw firms as opposed to observations. Subsequently, we repeat the analyses presented in Figures 1 and 2 using these bootstrapped samples. The bootstrap sample size equals 25% of the number of firms contained in the original sample. The predicted sign is negative for absolute DAC, income-increasing DAC, and restatements, positive for going concern opinions. For the table labeled *Test of significance* we classify matched samples as balanced when univariate t-tests cannot reject the null hypothesis that the means of the matching variables do not differ between Big N and non-Big N clients ( $p > 10\%$ , two-tailed), for the table labeled *Goodness-of-fit test* we classify matched samples as balanced when a Wald test cannot reject the null hypothesis that the matching variables do not explain the use of a Big N auditor ( $p > 10\%$ , two-tailed), and for the table labeled *Standardized bias test* we classify matched samples as balanced when the absolute standardized bias is smaller than 3% for all matching covariates. We estimate all regressions using probability weights derived from the matching procedure and cluster standard errors at the firm level (Dehejia and Wahba 2002). Using the Big N effects we perform t-tests to examine whether mean treatment effects are significantly different from zero and Wilcoxon rank-tests to examine whether median treatment effects are significantly different from zero. \*\*\* denotes statistical significance at the 1% level (two-tailed).

**Internet Appendix IH: Post-SOX Analysis – Probability Differences vs. Logit Differences**

*Test of significance*

Panel A: Matching without replacement

| Audit quality measure  | Nobs  | Reuse | Std. Bias | L1    | Mean   | Median | Std. Dev. | Range  |        | PCT Sign | PCT Significant |       |       |
|------------------------|-------|-------|-----------|-------|--------|--------|-----------|--------|--------|----------|-----------------|-------|-------|
|                        |       |       |           |       |        |        |           | Min.   | Max.   |          | 10%             | 5%    | 1%    |
| Absolute DAC           | 4,426 | 1.000 | 1.529     | 0.698 | -0.007 | -0.007 | 0.001     | -0.011 | 0.001  | 0.999    | 0.997           | 0.995 | 0.993 |
| Income-increasing DAC  | 2,345 | 1.000 | 1.754     | 0.721 | -0.007 | -0.007 | 0.001     | -0.011 | -0.003 | 1.000    | 0.996           | 0.995 | 0.973 |
| Restatements           | 4,441 | 1.000 | 1.501     | 0.698 | -0.005 | -0.006 | 0.002     | -0.012 | 0.001  | 0.989    | 0.693           | 0.509 | 0.197 |
| Going concern opinions | 1,755 | 1.000 | 1.683     | 0.646 | 0.023  | 0.023  | 0.003     | 0.011  | 0.032  | 1.000    | 0.999           | 0.997 | 0.961 |

Panel B: Matching with replacement

| Audit quality measure  | Nobs  | Reuse | Std. Bias | L1    | Mean   | Median | Std. Dev. | Range  |       | PCT Sign | PCT Significant |       |       |
|------------------------|-------|-------|-----------|-------|--------|--------|-----------|--------|-------|----------|-----------------|-------|-------|
|                        |       |       |           |       |        |        |           | Min.   | Max.  |          | 10%             | 5%    | 1%    |
| Absolute DAC           | 1,760 | 2.669 | 3.268     | 0.802 | -0.005 | -0.004 | 0.004     | -0.034 | 0.016 | 0.888    | 0.470           | 0.358 | 0.132 |
| Income-increasing DAC  | 2,136 | 3.270 | 2.776     | 0.795 | -0.005 | -0.006 | 0.004     | -0.024 | 0.015 | 0.941    | 0.659           | 0.566 | 0.299 |
| Restatements           | 2,754 | 2.990 | 2.172     | 0.777 | -0.002 | -0.002 | 0.005     | -0.041 | 0.012 | 0.617    | 0.121           | 0.087 | 0.037 |
| Going concern opinions | 2,579 | 3.379 | 2.046     | 0.738 | 0.018  | 0.018  | 0.004     | -0.011 | 0.034 | 0.998    | 0.904           | 0.833 | 0.602 |

*Goodness-of-fit test*

Panel A: Matching without replacement

| Audit quality measure  | Nobs  | Reuse | Std. Bias | L1    | Mean   | Median | Std. Dev. | Range  |        | PCT Sign | PCT Significant |       |       |
|------------------------|-------|-------|-----------|-------|--------|--------|-----------|--------|--------|----------|-----------------|-------|-------|
|                        |       |       |           |       |        |        |           | Min.   | Max.   |          | 10%             | 5%    | 1%    |
| Absolute DAC           | 4,485 | 1.000 | 1.890     | 0.698 | -0.007 | -0.007 | 0.001     | -0.010 | -0.002 | 1.000    | 0.998           | 0.998 | 0.995 |
| Income-increasing DAC  | 2,373 | 1.000 | 2.212     | 0.719 | -0.007 | -0.007 | 0.001     | -0.010 | -0.004 | 1.000    | 0.999           | 0.999 | 0.968 |
| Restatements           | 4,494 | 1.000 | 1.905     | 0.698 | -0.005 | -0.005 | 0.002     | -0.011 | 0.000  | 0.991    | 0.671           | 0.497 | 0.190 |
| Going concern opinions | 1,764 | 1.000 | 1.999     | 0.644 | 0.023  | 0.023  | 0.003     | 0.013  | 0.034  | 1.000    | 1.000           | 0.999 | 0.974 |

Panel B: Matching with replacement

| Audit quality measure  | Nobs   | Reuse | Std. Bias | L1    | Mean   | Median | Std. Dev. | Range  |       | PCT Sign | PCT Significant |       |       |
|------------------------|--------|-------|-----------|-------|--------|--------|-----------|--------|-------|----------|-----------------|-------|-------|
|                        |        |       |           |       |        |        |           | Min.   | Max.  |          | 10%             | 5%    | 1%    |
| Absolute DAC           | 11,864 | 5.728 | 3.343     | 0.788 | -0.003 | -0.003 | 0.002     | -0.020 | 0.006 | 0.979    | 0.691           | 0.472 | 0.113 |
| Income-increasing DAC  | 8,868  | 7.250 | 3.864     | 0.823 | -0.004 | -0.004 | 0.001     | -0.009 | 0.000 | 0.999    | 0.912           | 0.715 | 0.195 |
| Restatements           | 12,939 | 6.029 | 3.224     | 0.786 | 0.000  | 0.000  | 0.002     | -0.025 | 0.007 | 0.413    | 0.028           | 0.012 | 0.005 |
| Going concern opinions | 4,711  | 5.018 | 4.316     | 0.768 | 0.017  | 0.017  | 0.002     | 0.009  | 0.028 | 1.000    | 0.994           | 0.981 | 0.861 |

| <i>Standardized bias</i>              |       |       |           |       |        |        |           |        |        |          |                 |       |       |
|---------------------------------------|-------|-------|-----------|-------|--------|--------|-----------|--------|--------|----------|-----------------|-------|-------|
| Panel A: Matching without replacement |       |       |           |       |        |        |           |        |        |          |                 |       |       |
| Audit quality measure                 | Nobs  | Reuse | Std. Bias | L1    | Mean   | Median | Std. Dev. | Range  |        | PCT Sign | PCT Significant |       |       |
|                                       |       |       |           |       |        |        |           | Min.   | Max.   |          | 10%             | 5%    | 1%    |
| Absolute DAC                          | 4,406 | 1.000 | 1.397     | 0.698 | -0.007 | -0.007 | 0.001     | -0.011 | -0.004 | 1.000    | 0.999           | 0.999 | 0.991 |
| Income-increasing DAC                 | 2,290 | 1.000 | 1.298     | 0.721 | -0.007 | -0.007 | 0.001     | -0.011 | -0.004 | 1.000    | 0.999           | 0.994 | 0.952 |
| Restatements                          | 4,401 | 1.000 | 1.390     | 0.698 | -0.005 | -0.006 | 0.002     | -0.011 | 0.008  | 0.984    | 0.667           | 0.499 | 0.191 |
| Going concern opinions                | 1,726 | 1.000 | 1.289     | 0.648 | 0.023  | 0.023  | 0.003     | 0.006  | 0.033  | 1.000    | 0.999           | 0.995 | 0.941 |

  

| Panel B: Matching with replacement |       |       |           |       |        |        |           |        |       |          |                 |       |       |
|------------------------------------|-------|-------|-----------|-------|--------|--------|-----------|--------|-------|----------|-----------------|-------|-------|
| Audit quality measure              | Nobs  | Reuse | Std. Bias | L1    | Mean   | Median | Std. Dev. | Range  |       | PCT Sign | PCT Significant |       |       |
|                                    |       |       |           |       |        |        |           | Min.   | Max.  |          | 10%             | 5%    | 1%    |
| Absolute DAC                       | 7,326 | 4.334 | 1.429     | 0.774 | -0.004 | -0.004 | 0.002     | -0.016 | 0.007 | 0.985    | 0.748           | 0.602 | 0.223 |
| Income-increasing DAC              | 5,145 | 4.948 | 1.362     | 0.793 | -0.005 | -0.005 | 0.002     | -0.019 | 0.004 | 0.997    | 0.917           | 0.837 | 0.413 |
| Restatements                       | 7,741 | 4.495 | 1.465     | 0.771 | -0.001 | -0.001 | 0.003     | -0.016 | 0.012 | 0.561    | 0.060           | 0.035 | 0.012 |
| Going concern opinions             | 3,055 | 3.721 | 1.383     | 0.741 | 0.018  | 0.018  | 0.003     | 0.001  | 0.031 | 1.000    | 0.959           | 0.910 | 0.706 |

*Notes.* This appendix presents the results of an analysis that repeats the analysis in Figure 2 using an alternative approach for varying match closeness. Specifically, instead of using caliper widths that are based on differences in logits we now use caliper widths based on differences in probability. The caliper width ranges in this analysis from a 0 to 0.03 probability difference. *Nobs* equals the average number of treatment firms retained in matched samples, *Reuse* equals the average of the average number of times included control firms are matched to treatment firms, *Std. Bias* equals the average of the average of the absolute standardized percentage bias across all covariates, *L1* equals the average multivariate *L1*, *PCT Sign* is the fraction of treatment effects that are in the predicted direction, and *PCT Significant* is the fraction of treatment effects that are in the predicted direction and significant at either  $p < 10\%$ ,  $p < 5\%$ , or  $p < 1\%$  (two-tailed). The predicted sign is negative for absolute DAC, income-increasing DAC, and restatements, positive for going concern opinions. For the table labeled *Test of significance* we classify matched samples as balanced when univariate t-tests cannot reject the null hypothesis that the means of the matching variables do not differ between Big N and non-Big N clients ( $p > 10\%$ , two-tailed), for the table labeled *Goodness-of-fit test* we classify matched samples as balanced when a Wald test cannot reject the null hypothesis that the matching variables do not explain the use of a Big N auditor ( $p > 10\%$ , two-tailed), and for the table labeled *Standardized bias* we classify matched samples as balanced when the absolute standardized bias is smaller than 3% for all matching covariates. We estimate all regressions using probability weights derived from the matching procedure and cluster standard errors at the firm level (Dehejia and Wahba 2002).
